# Supplementary material for: Mutations in α-synuclein, TDP-43 and tau prolong protein half-life through diminished degradation by lysosomal proteases
Source: PubMed Central journal article supplement (PMC10155372; doi:10.1186/s13024-023-00621-8), 2023-05-02
Supplement: 13024_2023_621_MOESM1_ESM.pdf [file 13024_2023_621_MOESM1_ESM.pdf]

Figure S1

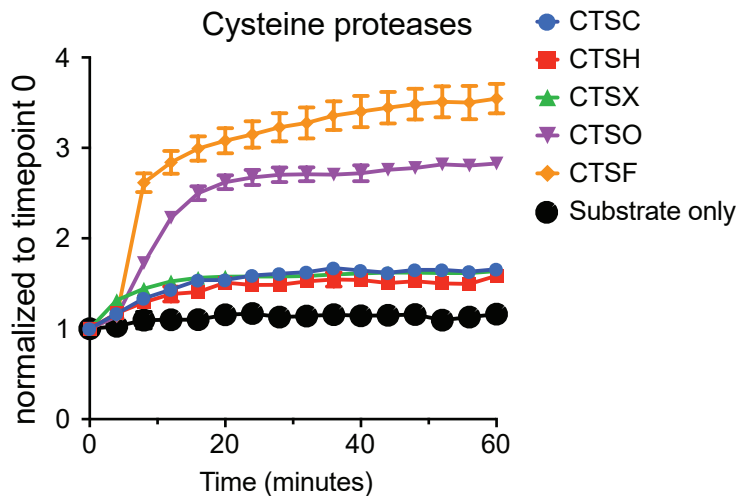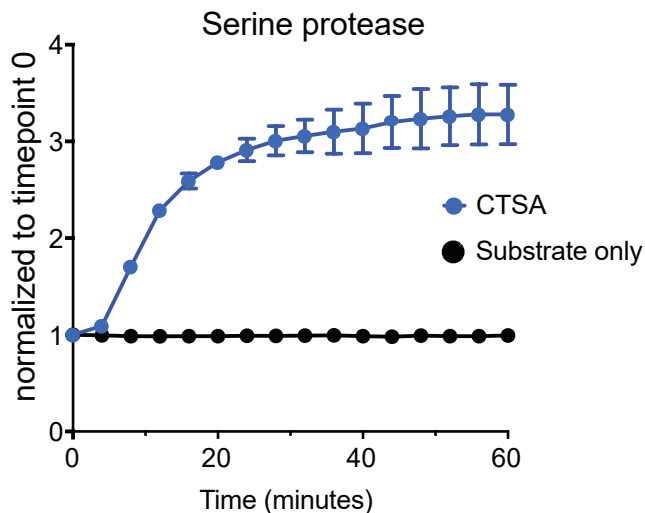



## Alpha-synuclein

<sup>1</sup>MDVFMKGLSKAKEGVVAAAEKTKQGVAAEAGKTKEGVLVVGSKTKEGVVHGVATVAEKTKEQVTNV  
GGAVVTGVTAVAQKTVEGAGSIAAATGFVKKDQLGKNEEGAPQEGILEMPVDPDNEAYEMPSEEG  
YQDYEPEA<sup>140</sup>

## Tau

<sup>1</sup>MAEPRQEFEFVMEHDAGTYGLGDRKDQGGYT<sup>1</sup>MHQD<sup>2</sup>QEGD<sup>3</sup>TDAGLKESPL<sup>4</sup>QTP<sup>5</sup>TEDGS<sup>6</sup>E<sup>7</sup>EP<sup>8</sup>G<sup>9</sup>SETSDA  
KSTPTAEDVTAP<sup>10</sup>LVDEGAPGKQAAAQPHTEIPEGTTAAEEAGIGDTPSLEDEAAAGHVTQARMVSKSK  
DGTGSDDKKAKGADGKTKIATPRGAAPPQKGQANATRIPAKTPPAPKTPP<sup>11</sup>SSGEPPKSGDRSG<sup>12</sup>YS<sup>13</sup>  
SP<sup>14</sup>GSP<sup>15</sup>GTPGSRSRTPSLPTPPTREP<sup>16</sup>PKKVAVVRTPPKSPSSAKSRLQTAPVPM<sup>17</sup>PDLKNVKSIGSTE  
NLKHQ<sup>18</sup>P<sup>19</sup>GGGKVQ<sup>20</sup>IINKKLD<sup>21</sup>LSNVQSKCGSKDNIKHVP<sup>22</sup>GGGSVQ<sup>23</sup>IVYKPV<sup>24</sup>DL<sup>25</sup>SKVTSKCGSLGNIHH  
KP<sup>26</sup>GGQVEVKSEKLD<sup>27</sup>FKDRVQSKIGSLDNITHVP<sup>28</sup>GGNKKIETHKLT<sup>29</sup>FRENAKAKTDHGAEIVYKS  
PVVSGDTS<sup>30</sup>PRHL<sup>31</sup>SNVSSTGSIDMVDS<sup>32</sup>PQLATLAD<sup>33</sup>EV<sup>34</sup>SASLAKQGL<sup>441</sup>

## TDP-43

<sup>1</sup>MSEYIRVTEDE<sup>2</sup>ND<sup>3</sup>EP<sup>4</sup>IEI<sup>5</sup>PS<sup>6</sup>EDDGT<sup>7</sup>VL<sup>8</sup>LSTVTAQ<sup>9</sup>FP<sup>10</sup>GACGL<sup>11</sup>RY<sup>12</sup>RNPVSQCM<sup>13</sup>RGVRLVEGIL<sup>14</sup>HAP<sup>15</sup>DA  
GWGNL<sup>16</sup>VY<sup>17</sup>VVNYPKDNKRKMD<sup>18</sup>ETDASSAVKV<sup>19</sup>KRAVQ<sup>20</sup>KTS<sup>21</sup>DLIVL<sup>22</sup>GL<sup>23</sup>LPWKTE<sup>24</sup>QDLKEYFST<sup>25</sup>FG<sup>26</sup>EVLM  
VQVKKDLKTGHSKGF<sup>27</sup>GFVR<sup>28</sup>TEYETQ<sup>29</sup>VKVMSQR<sup>30</sup>H<sup>31</sup>MIDGRWCDCKLPNSK<sup>32</sup>QS<sup>33</sup>QDEPLRSR<sup>34</sup>KVFV<sup>35</sup>GRC  
TEDMTEDEL<sup>36</sup>REF<sup>37</sup>FSQ<sup>38</sup>YGDVMDV<sup>39</sup>FIPK<sup>40</sup>PF<sup>41</sup>RAFAFVT<sup>42</sup>FADDQIA<sup>43</sup>QSLCGEDLI<sup>44</sup>IKGISVHISNAEPKH  
NSNRQLERSGRFGGNP<sup>45</sup>GGFGN<sup>46</sup>QGGFGNSRGGGAGL<sup>47</sup>GNNQGS<sup>48</sup>NMGGGMNF<sup>49</sup>GAFSINPAM<sup>50</sup>MAAQAAL  
QSSWGMMLASQ<sup>51</sup>QN<sup>52</sup>QSGPSGNNQ<sup>53</sup>QGNMQREPNQAF<sup>54</sup>GSGNNS<sup>55</sup>YSGSNSGAAIGWGSASNAGSGG  
FNGGF<sup>56</sup>GSSMSDSKSSGWM<sup>414</sup>

X Cleaved by CTSK after this residue (P1 position)

X Cleaved by CTSG after this residue (P1 position)



a

| Asyn Vmax (nM/min) |       |        |        |        |
|--------------------|-------|--------|--------|--------|
|                    | WT    | Mutant | WT     | Mutant |
|                    | CTSD  |        | CTSE   |        |
| A30P               | 0.0   | 0.0    | 0.0    | 0.0    |
| E46K               | 0.0   | 0.0    | 0.0    | 0.0    |
| G51D               | 0.0   | 0.0    | 0.0    | 0.0    |
| A53T               | 0.0   | 0.0    | 45.2   | 17.2   |
|                    | CTSB  |        | CTSF   |        |
| A30P               | 149.7 | 116.7  | 0.0    | 0.0    |
| E46K               | 172.2 | 176.1  | 0.0    | 0.0    |
| G51D               | 152.4 | 144.1  | 0.0    | 0.0    |
| A53T               | 149.3 | 175.7  | 0.0    | 0.0    |
|                    | CTSL  |        | CTSK   |        |
| A30P               | 130.6 | 184.6  | 59.1   | 109.7  |
| E46K               | 30.9  | 45.0   | 2000.0 | 2000.0 |
| G51D               | 34.0  | 12.2   | 2000.0 | 0.0    |
| A53T               | 83.1  | 73.0   | 44.9   | 0.0    |
|                    | CTSS  |        | CTSV   |        |
| A30P               | 161.8 | 252.7  | 323.6  | 397.8  |
| E46K               | 0.0   | 0.0    | 16.0   | 16.1   |
| G51D               | 0.0   | 0.0    | 148.1  | 133.4  |
| A53T               | 76.0  | 77.4   | 228.6  | 255.5  |
|                    | AEP   |        |        |        |
| A30P               | 0.0   | 0.0    |        |        |
| E46K               | 0.0   | 0.0    |        |        |
| G51D               | 0.0   | 0.0    |        |        |
| A53T               | 0.0   | 0.0    |        |        |

b

| TDP-43 Vmax (nM/min) |        |        |            |        |
|----------------------|--------|--------|------------|--------|
|                      | WT     |        | Mutant     |        |
|                      |        |        |            |        |
|                      | CTSD   |        | CTSE       |        |
| G298S                | 0.0    | 0.0    | 0.0        | 0.0    |
| A315T                | 0.0    | 0.0    | 60.0       | 23.4   |
| A321G                | 135.2  | 112.5  | 34.1       | 21.0   |
| Q331K                | 0.0    | 0.0    | 0.0        | 0.0    |
| M337V                | 0.0    | 0.0    | 0.0        | 0.0    |
|                      | CTSB   |        | CTSF       |        |
| G298S                | 61.2   | 45.0   | 0.0        | 0.0    |
| A315T                | 131.0  | 333.4  | 0.0        | 0.0    |
| A321G                | 945.3  | 1116.8 | 0.0        | 0.0    |
| Q331K                | 181.0  | 0.0    | 0.0        | 0.0    |
| M337V                | 45.4   | 90.0   | 0.0        | 0.0    |
|                      | CTSL   |        | CTSK (1nM) |        |
| G298S                | 2000.0 | 2000.0 | 87.3       | 63.7   |
| A315T                | 2000.0 | 2000.0 | 2000.0     | 2000.0 |
| A321G                | 2000.0 | 2000.0 | 99.2       | 108.3  |
| Q331K                | 220.0  | 0.0    | 133.3      | 2000.0 |
| M337V                | 2000.0 | 2000.0 | 52.5       | 37.4   |
|                      | CTSS   |        | CTSV       |        |
| G298S                | 38.2   | 46.8   | 181.0      | 196.3  |
| A315T                | 93.8   | 43.5   | 205.0      | 155.4  |
| A321G                | 145.3  | 159.1  | 82.2       | 79.0   |
| Q331K                | 306.5  | 2000.0 | 216.3      | 26.5   |
| M337V                | 115.2  | 61.9   | 161.7      | 124.9  |
|                      | AEP    |        |            |        |
| G298S                | 0.0    | 0.0    |            |        |
| A315T                | 0.0    | 0.0    |            |        |
| A321G                | 0.0    | 0.0    |            |        |
| Q331K                | 0.0    | 0.0    |            |        |
| M337V                | 0.0    | 0.0    |            |        |

c

| Tau Vmax (nM/min) |        |        |             |        |
|-------------------|--------|--------|-------------|--------|
|                   | WT     | Mutant | WT          | Mutant |
|                   | CTSD   |        | CTSE        |        |
| K257T             | 0.0    | 0.0    | 0.0         | 0.0    |
| N279K             | 2000.0 | 2000.0 | 2000.0      | 2000.0 |
| P301S             | 0.0    | 0.0    | 0.0         | 0.0    |
| S305N             | 0.0    | 0.0    | 53.5        | 0.0    |
|                   | CTSB   |        | CTSF        |        |
| K257T             | 2000.0 | 2000.0 | 40.4        | 0.0    |
| N279K             | 2000.0 | 2000.0 | 0.0         | 0.0    |
| P301S             | 140.4  | 198.8  | 0.0         | 0.0    |
| S305N             | 16.3   | 8.6    | 0.0         | 0.0    |
|                   | CTSL   |        | CTSK (1 nM) |        |
| K257T             | 2000.0 | 2000.0 | 289.7       | 170.0  |
| N279K             | 2000.0 | 2000.0 | 72.2        | 120.5  |
| P301S             | 2000.0 | 2000.0 | 0.0         | 0.0    |
| S305N             | 2000.0 | 2000.0 | 0.0         | 0.0    |
|                   | CTSS   |        | CTSV        |        |
| K257T             | 23.6   | 58.5   | 0.0         | 0.0    |
| N279K             | 20.7   | 0.0    | 0.0         | 0.0    |
| P301S             | 0.0    | 0.0    | 65.0        | 45.9   |
| S305N             | 23.8   | 28.5   | 126.9       | 146.1  |
|                   | AEP    |        |             |        |
| K257T             | 42.8   | 29.1   |             |        |
| N279K             | 95.7   | 0.0    |             |        |
| P301S             | 0.0    | 0.0    |             |        |
| S305N             | 0.0    | 0.0    |             |        |



Figure S4

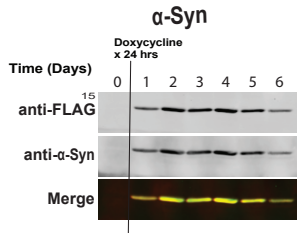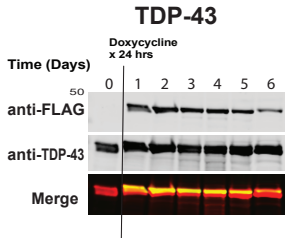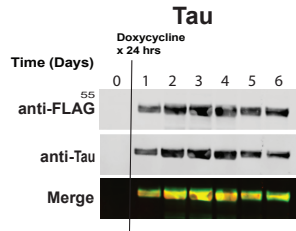



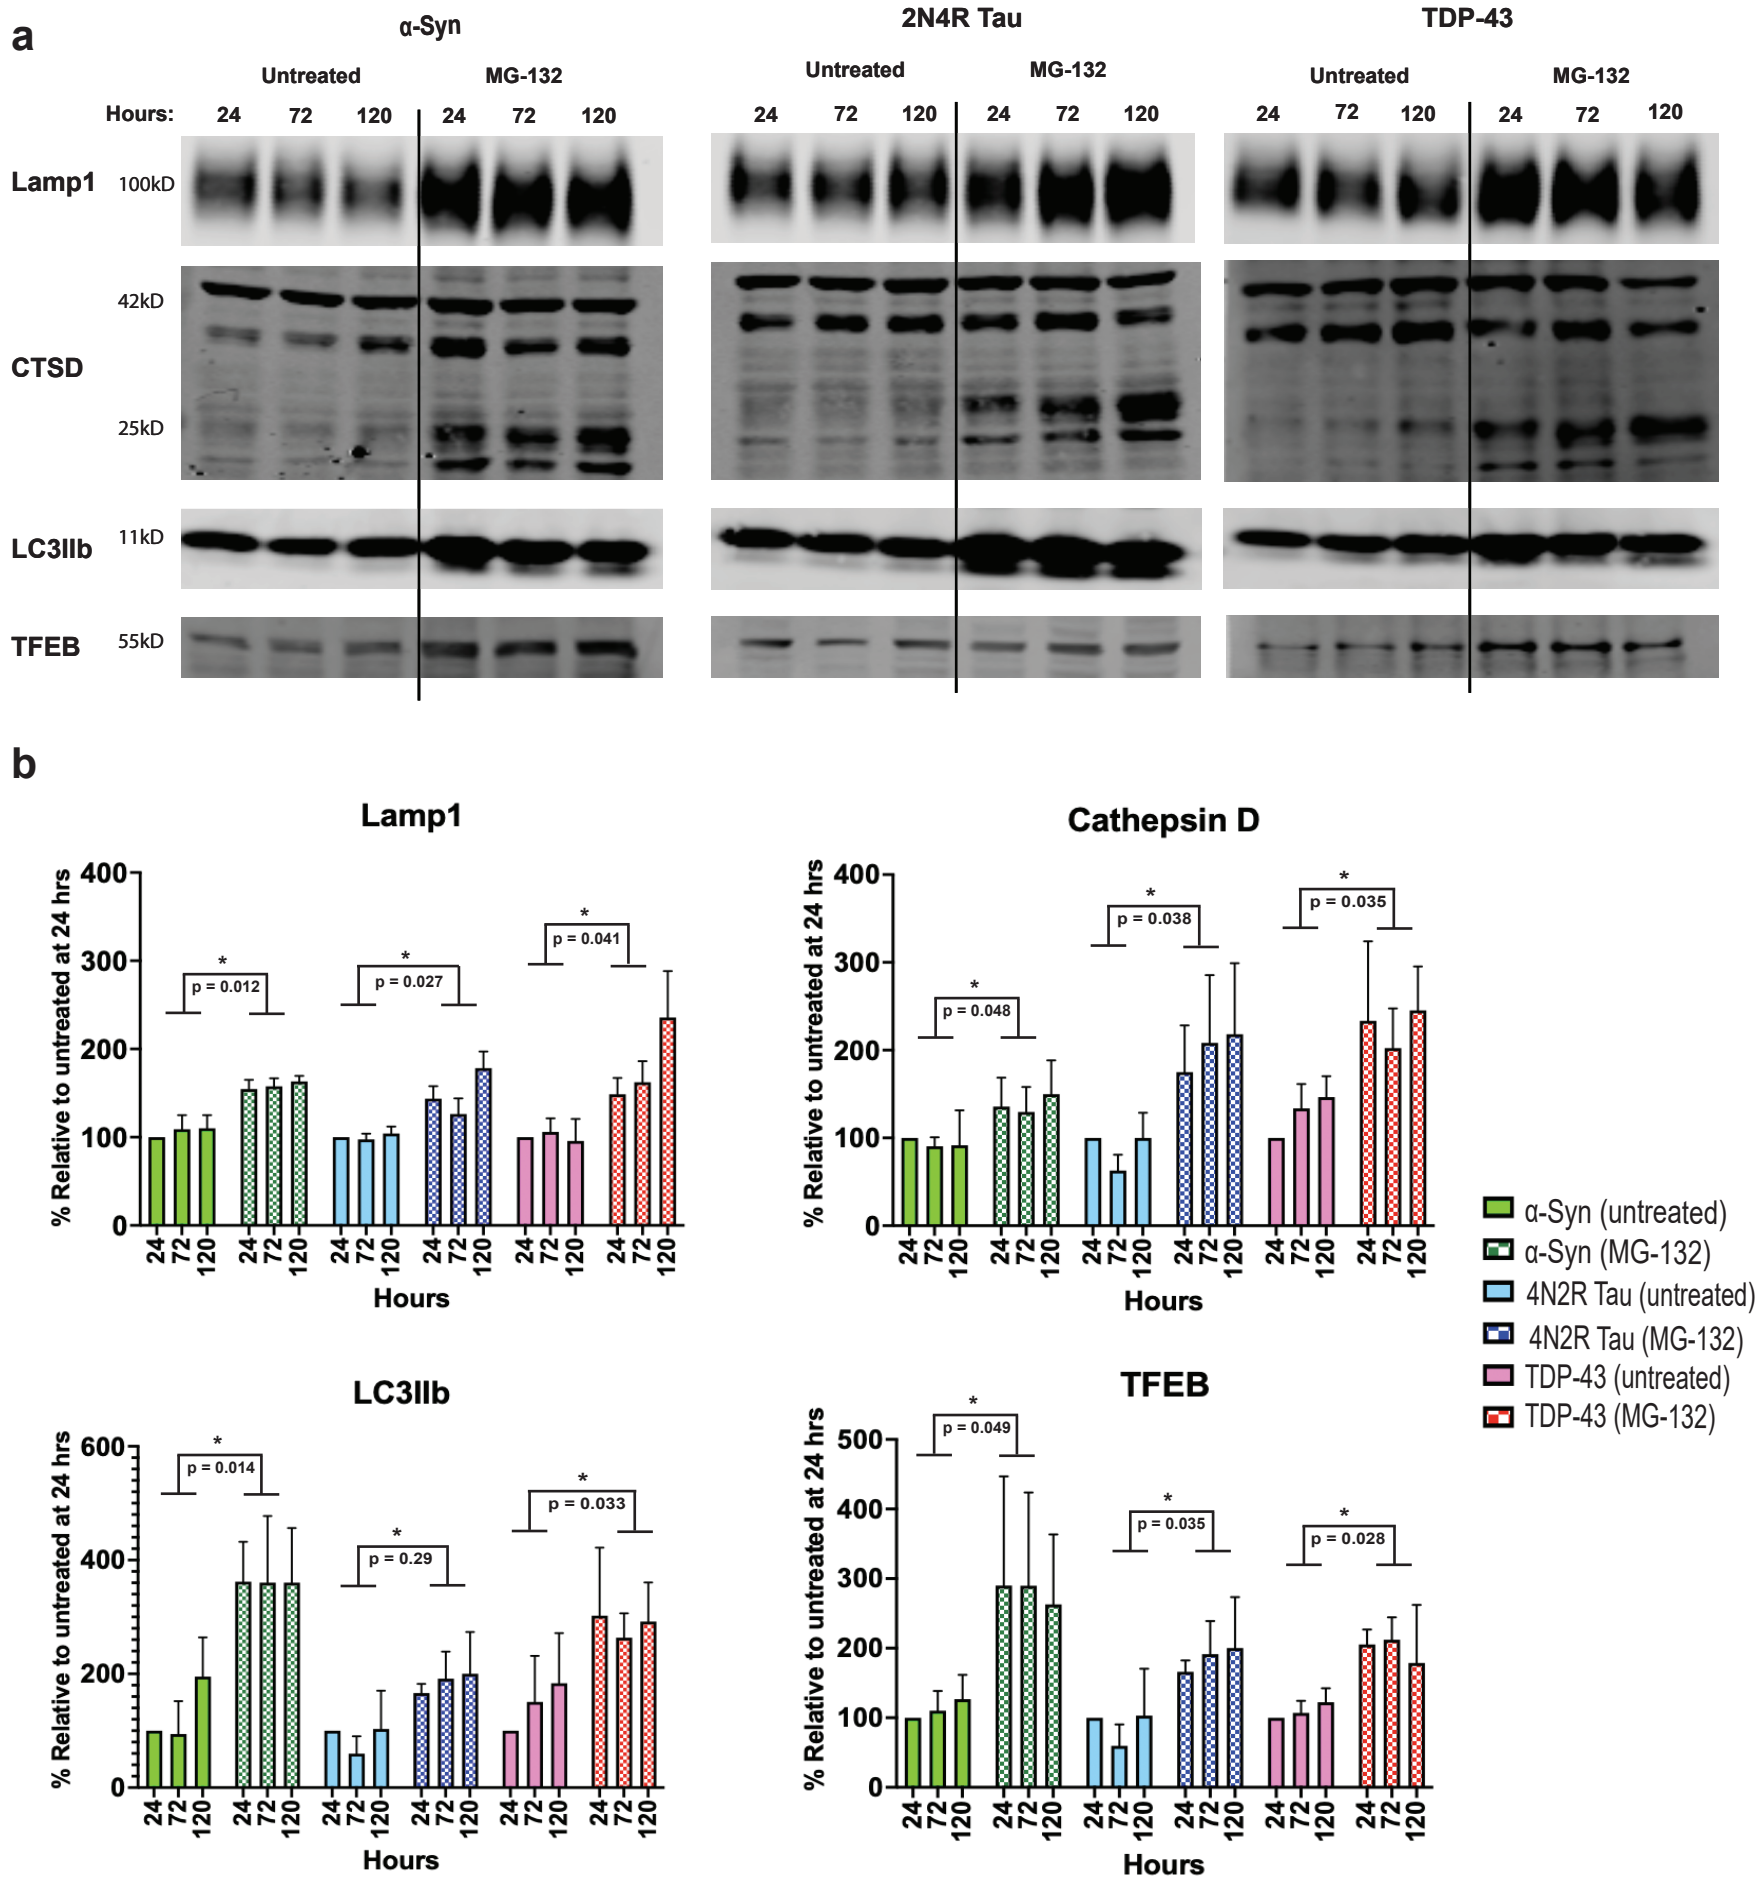



**a**SH-SY5Y cells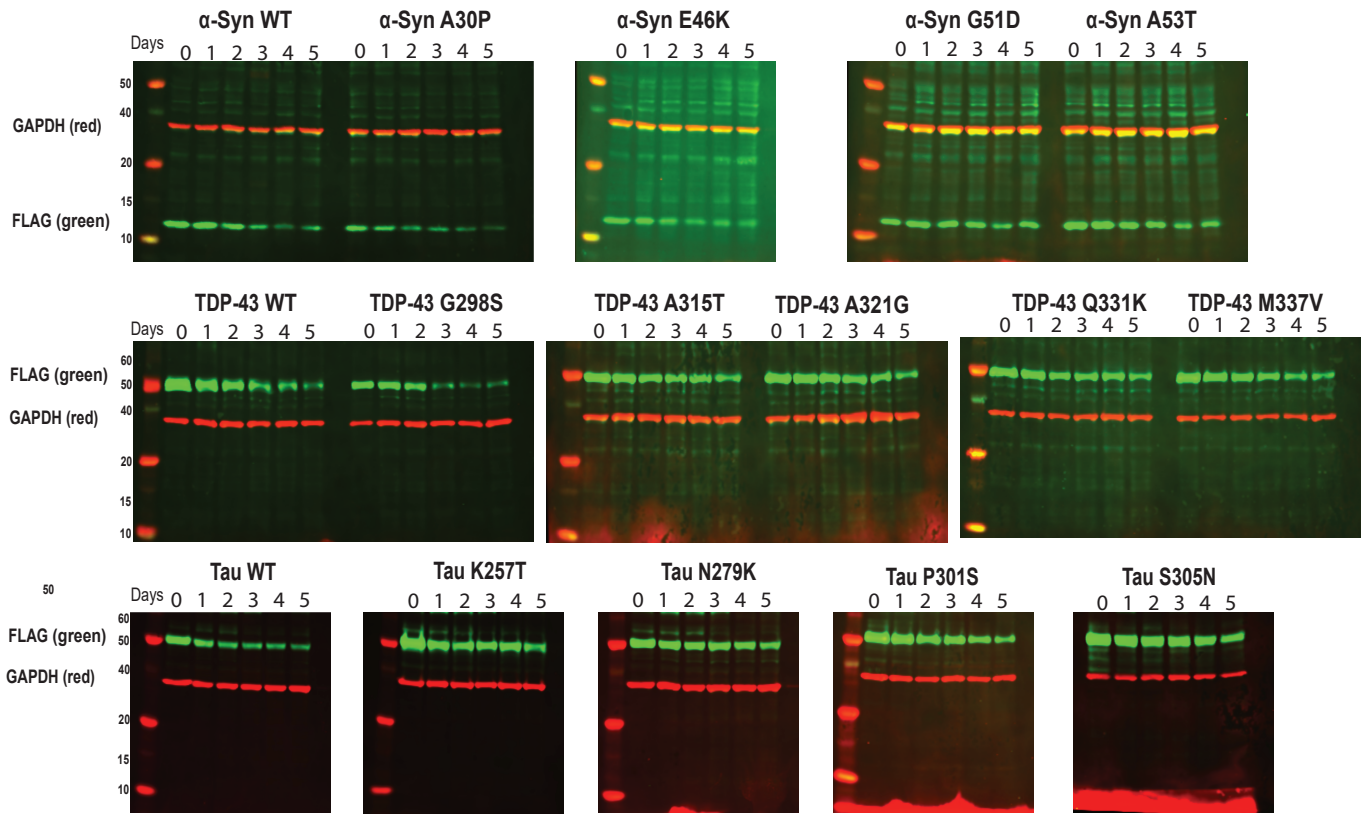**b**iNeurons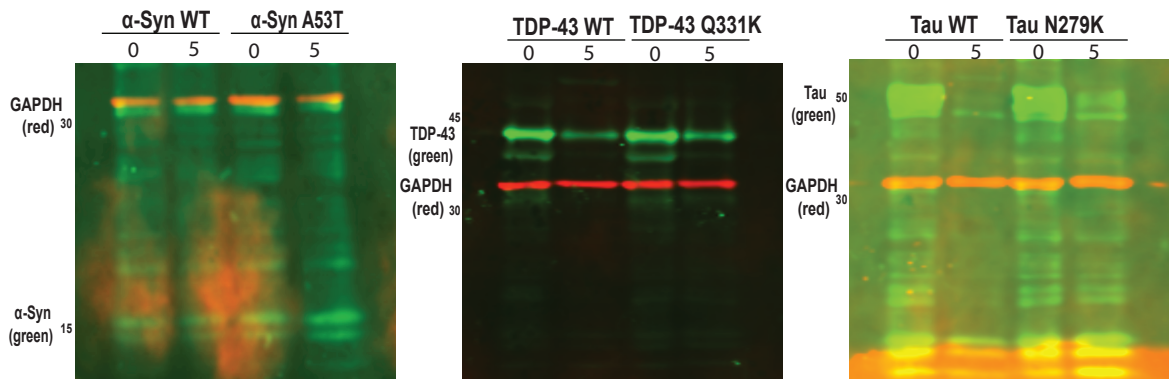



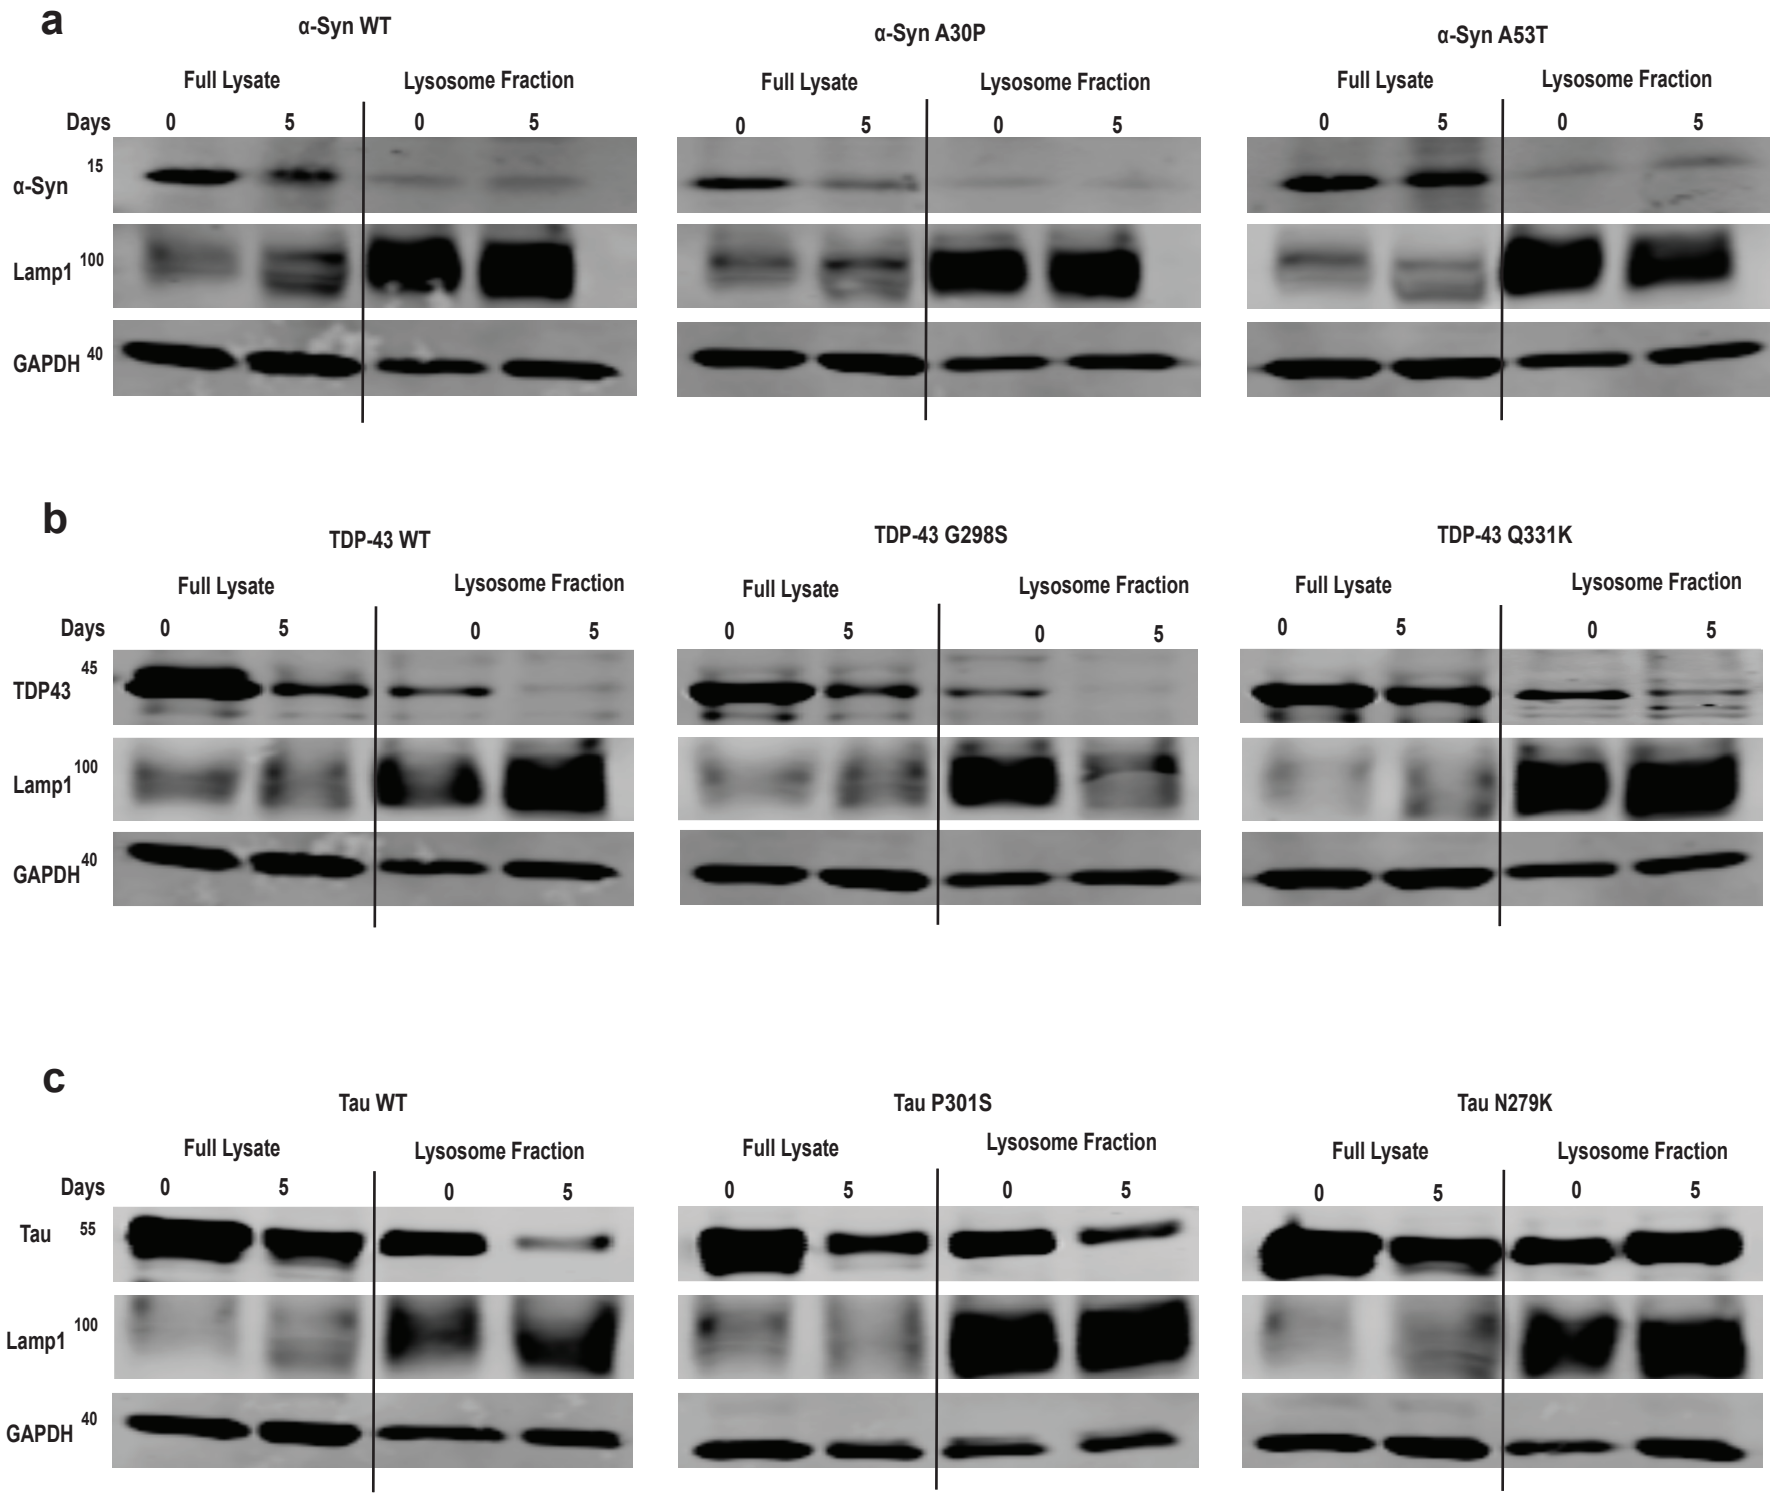



Table S1

| Sequence Name     | peptide sequence         | Sequence Name     | peptide sequence          | Sequence Name         | peptide sequence         |
|-------------------|--------------------------|-------------------|---------------------------|-----------------------|--------------------------|
| alpha-syn_1-18    | REGMDVFMKGLSKAKEGVVAAGGR | tau_1-18          | RGGMAEPRQEFVEMDHAGTYGKR   | tdp43_1-18            | RKGMSEYIRVTEDENDIEIGKR   |
| alpha-syn_14-31   | RNKGVVAAAEKTKQGVAAEAGNGR | tau_14-31         | RKGHAGTYGLGDRKDQGGYTMGSR  | tdp43_14-31           | RKGEPIEPSEDDGTVLLSTVGKR  |
| alpha-syn_27-44   | RDPAEAAGKTKEGVLYVGSKTGSR | tau_27-44         | RKTGGYTMHQDQEGD TDAGLKQQR | tdp43_27-44_C39A      | RDGLLSTVTAQFPGAAGLRYRGDK |
| alpha-syn_40-57   | RDGVGSKTKEGVVHGVATVAEGNR | tau_40-57         | RPGDAGLKESPLQTPTEDGSEGKR  | tdp43_40-57_C50A      | RDGGLRYRNPVSQAMRGVRLVGDR |
| alpha-syn_53-70   | RGGATVAEKTKEQVTNVGGAVGKR | tau_53-70         | RKGEDGSEEPGSETSDAKSTPGGR  | tdp43_53-70           | RSGGVRLVEGILHAPDAGWNGKK  |
| alpha-syn_66-83   | RKGVGGAVVTGVTAVAQKTVEGSR | tau_66-83         | RKGAKSTPTAEDVTAPLVDEGGIR  | tdp43_66-83           | RDGAGWGNLVVYVNPKNKRGRDR  |
| alpha-syn_79-96   | RGGQKTVEGAGSIAATGFVKGSR  | tau_79-96         | RKGLVDEGAPGKQAAQPHTEGKR   | tdp43_79-96           | RDGKDNKRKMDETDASSAVKVGSR |
| alpha-syn_92-109  | RGGTGFVKKDKLGKNEEGAPQGNR | tau_92-109        | RKGQPHTEIPEGTTAEEAGIGGQR  | tdp43_92-109          | RDGSAVKVKRAVQKTSDLMLGSR  |
| alpha-syn_105-118 | RRKGEGAPQEGILEMPVGGKGR   | tau_105-122       | RKNEAGIGDTPSLEDEAAGHV GKR | tdp43_105-122         | RKSDLMLGLPWKTTEQDLKEGSR  |
| alpha-syn_114-125 | RSRKGEDMPVDPDNEAYGKGR    | tau_118-135       | RDNAAGHVTQARMVSKSKDGTGGR  | tdp43_118-135         | RKGQDLKEYFSTFGEVLMVQVGNR |
| alpha-syn_121-132 | RGRKGDNEAYEMPSEEGGGKGR   | tau_131-148       | RQGSKDGTGSDDKKAKGADGKGR   | tdp43_131-148         | RSDLMVQVKDLKTGHSGKFGGDR  |
| alpha-syn_128-140 | RNRGKPSEEGYQDYEP EAGGKR  | tau_144-161       | RDGGADGKTKIATPRGAAPP GGDR | tdp43_144-161         | REPSKGFVFRFTEYETQVKVGGR  |
|                   |                          | tau_157-174       | RESAAPPQGKQANATRIPAKGDR   | tdp43_157-174_C173A   | RDGTQVKVMSQRHMIDGRWADGGR |
|                   |                          | tau_170-187       | RDGRIPAKTPPAPKTPSSGEGNR   | tdp43_170-187_CC173AA | RSSGRWADAKLPNSKQSQDEPGKR |
|                   |                          | tau_183-200       | RGGPSSGEPKSGDRSGYSSPGKR   | tdp43_183-200_C198A   | REGSQDEPLRSRKVFVGRATEGGR |
|                   |                          | tau_196-213       | RDGGYSSPGSPGTPGSRRTPGDR   | tdp43_196-213_C198A   | RKSGRATEDMTEDELREFFSQGGR |
|                   |                          | tau_209-226       | REDRSRTPSLPTPTREPKVGDR    | tdp43_209-226         | RNGEFFSQYGDVMDVFIPKPFGR  |
|                   |                          | tau_222-239       | RDGEPKKVAVVRTPPKSPSSAGDR  | tdp43_222-239         | RKSIPKPFRAFAFVTFADDQIGSR |
|                   |                          | tau_235-252       | RDGSPSSAKSRLQTAPVPMPDGR   | tdp43_235-252_C244A   | RKIADDQIAQSLAGEDLIKGSR   |
|                   |                          | tau_248-265       | REGVPMPDLKNVSKIGSTENGYR   | tdp43_248-265         | RNGLIKGISVHISNAEPKHNGSR  |
|                   |                          | tau_261-278       | RNGGSTENLKHQPGGKVKIIGDR   | tdp43_261-278         | REGEPKHNSNRQLERSGRFGGTDR |
|                   |                          | tau_274-291_C291A | RDGKVQIINKKLDLSNVQSKAGER  | tdp43_274-291         | RSDGRFGGNPGGFGNQGGFGNGGR |
|                   |                          | tau_300-317       | RDGVPGGGSVQVYKPVDSLKGDR   | tdp43_287-304         | RTDGGFGNSRGGGAGLGNQGGDR  |
|                   |                          | tau_313-330_C322A | RSGVDLSKVTSKAGSLGNIHHSR   | tdp43_300-317         | RDGGNNQGSNMGGGMNFGAFSGGR |
|                   |                          | tau_326-343       | REGGNIHHKPGGGQVEVKSEKGR   | tdp43_313-330         | RDGFGAFSINPAMMAAAQAALGNR |
|                   |                          | tau_339-356       | RGGVKSEKLD FKDRVQSKIGSGDR | tdp43_326-343         | RSGAQAAQLQSSWGMMGLASQGKR |
|                   |                          | tau_352-369       | REGSKIGSLDNITHVPGGNGKTR   | tdp43_339-356         | RNKMLASQQNQSGPSGNNQNGGSR |
|                   |                          | tau_365-382       | RSDGGGNKKIETHKLT FRENAGSR | tdp43_352-369         | RKGNNQNQGNMQREPNAFGSGSR  |
|                   |                          | tau_378-395       | RDGFRENAKAKTDHGA EIVYKGR  | tdp43_365-382         | RKGQAFGSGNNSYSGSNSGAAGKR |
|                   |                          | tau_391-408       | RMGEIVYKSPVVS GDTSPRHLGSR | tdp43_378-395         | RKGNSGAAGWGSASNAGSGSGKR  |
|                   |                          | tau_404-421       | RDGSPRHLSNVSS TGSIDMVDGSR | tdp43_391-408         | RKGAGSGSGFNGGFGSSMDSKGNR |
|                   |                          | tau_417-434       | RKGIDMVDSPQLATLADEV SAGKK | tdp43_404-414         | RNGSMDSKSSGWGMGGR        |
|                   |                          | tau_430-441       | RPKDEV SASLAKQGLGSR       |                       |                          |



| Cathepsins | Pre-activation:                                                                                                                                                                                            | Protease concentrations and pHs used for mass spectrometry: | Mass spectrometry time points: |
|------------|------------------------------------------------------------------------------------------------------------------------------------------------------------------------------------------------------------|-------------------------------------------------------------|--------------------------------|
| CTSA       | Trans-activated with CTSL following the manufacturer's recommendation. The irreversible cysteine protease inhibitor E-64 was then added for an additional 30 min at 37 °C to allow for inhibition of CTSL. | 41 nM in pH 4.5                                             | 1h, 4h                         |
| CTSB       | N/A                                                                                                                                                                                                        | 20 nM in pH 4.5 and 5.5                                     | 1h, 4h                         |
| CTSC       | Trans-activated with CTSL following the manufacturer's recommendation. The irreversible cysteine protease inhibitor E-64 was then added for an additional 30 min at 37 °C to allow for inhibition of CTSL. | N/A                                                         | 1h, 4h                         |
| CTSD       | N/A                                                                                                                                                                                                        | 10 nM in pH 3.4 and 4.5                                     | 1h, 4h                         |
| CTSE       | N/A                                                                                                                                                                                                        | 10 nM in pH 3.4 and 4.5                                     | 1h, 4h                         |
| CTSF       | N/A                                                                                                                                                                                                        | 50 nM in pH 4.5 buffer                                      | 2h, 6h                         |
| CTSG       | N/A                                                                                                                                                                                                        | N/A                                                         | 1h, 4h                         |
| CSTH       | Trans-activated with thermolysin following the manufacturer's recommendation. Phosphoramidon was then added to these preparations for an additional 30 min at 37 °C to allow for inhibition of thermolysin | N/A                                                         | 1h, 4h                         |
| CTSK       | N/A                                                                                                                                                                                                        | 1 nM at pH 4.5                                              | 15min, 2h                      |
| CTSL       | N/A                                                                                                                                                                                                        | 8.0 nM at pH 4.5 and 5.5                                    | 1h, 4h                         |
| CTSO       | N/A                                                                                                                                                                                                        | 25 nM at pH 5.5                                             | 1h, 4h                         |
| CTSS       | N/A                                                                                                                                                                                                        | 10 nM at pH 4.5 and 5.5                                     | 1h, 4h                         |
| CTSV       | N/A                                                                                                                                                                                                        | 20 nM at pH 3.4 and 4.5                                     | 1h, 4h                         |
| CTSX       | Preincubated with dithiothreitol (DTT) following the manufacturer's recommendation.                                                                                                                        | 50 nM at pH 3.4 and 4.5                                     | 1h, 4h                         |
| AEP        | N/A                                                                                                                                                                                                        | 20 nM at pH 4.5 and 5.5                                     | 1h, 4h                         |



**$\alpha$ -Syn****a**

| Mutation | Peptide sequence             | P1 site | CTSB            | P1 site | CTSK           | P1 site | CTSL            | P1 site | CTSS           | P1 site | CTSD            | P1 site | CTSE            |
|----------|------------------------------|---------|-----------------|---------|----------------|---------|-----------------|---------|----------------|---------|-----------------|---------|-----------------|
| A53T     | 51-GV <b>A</b> TV A E KT-59  | 57      | 5<br>(-79.35)   | 56      | 2<br>(-31.80)  | 57      | 7<br>(-79.20)   | 57      | 5<br>(-37.13)  | 55      | 2<br>(-70.91)   | 55      | 9<br>(-83.46)   |
| G51D     | 47-GV V <b>H</b> GV A TV-55  | 53      | 19<br>(-100.47) | -       | -              | 53      | 44<br>(-115.01) | 53      | 29<br>(-63.75) | 52      | 15<br>(-97.34)  | 48      | 20<br>(-101.85) |
| E46K     | 40-VG S KT K  <b>E</b> GV-48 | 42      | 28<br>(-107.33) | 41      | 28<br>(-71.35) | 42      | 22<br>(-96.04)  | 44      | 43<br>(-75.58) | 45      | 48<br>(-127.55) | 45      | 48<br>(-137.62) |
| A30P     | 24-QG V A EA <b>A</b> GK-32  | 25      | 37<br>(-115.57) | 27      | 6<br>(-45.70)  | 27      | 23<br>(-98.26)  | 27      | 20<br>(-55.19) | 26      | 21<br>(-106.02) | 26      | 13<br>(-91.31)  |

**TDP-43****b**

| Mutation | Peptide sequence               | P1 site | CTSB           | P1 site | CTSK           | P1 site | CTSL           | P1 site | CTSS           | P1 site | CTSD           | P1 site | CTSE           |
|----------|--------------------------------|---------|----------------|---------|----------------|---------|----------------|---------|----------------|---------|----------------|---------|----------------|
| A321G    | 318-IN <b>P</b> A M MAAA-326   | 321     | 8<br>(-60.10)  | 324     | 11<br>(-37.03) | 324     | 8<br>(-56.12)  | 321     | 3<br>(0)       | 322     | 7<br>(-39.72)  | 322     | 6<br>(-46.79)  |
| A315T    | 314-G <b>A</b> FSIN PA M-322   | 321     | 8<br>(-60.10)  | -       | -              | 319     | 30<br>(-74.32) | 321     | 3<br>(0)       | 321     | 32<br>(-49.76) | 321     | 13<br>(-58.00) |
| Q331K    | 327-Q AAL  <b>Q</b> SSWG-335   | 327     | 25<br>(-79.99) | 331     | 2<br>(-10.24)  | 331     | 1<br>(-24.72)  | 331     | 9<br>(-20.45)  | -       | -              | 330     | 11<br>(-57.00) |
| M337V    | 336-M <b>M</b>  GM LAS Q Q-344 | 337     | 26<br>(-80.55) | 342     | 17<br>(-45.01) | -       | -              | 343     | 41<br>(-44.74) | 339     | 4<br>(-33.79)  | 339     | 8<br>(-49.36)  |
| G298S    | 294-GGG <b>A</b> GLNN-302      | -       | -              | -       | -              | -       | -              | -       | -              | -       | -              | -       | -              |

**Tau****c**

| Mutation | Peptide sequence              | P1 site | CTSB           | P1 site | CTSK           | P1 site | CTSL           | P1 site | CTSS          | P1 site | CTSD           | P1 site | CTSE           |
|----------|-------------------------------|---------|----------------|---------|----------------|---------|----------------|---------|---------------|---------|----------------|---------|----------------|
| N279K    | 274-KVQI  <b>I</b> N KKL-282  | 279     | 8<br>(-73.99)  | 279     | 47<br>(-55.87) | 279     | 4<br>(-51.57)  | 279     | 8<br>(-28.70) | 277     | 5<br>(-65.12)  | 277     | 4<br>(-42.20)  |
| S305N    | 304-G <b>S</b> VQI V YKP-312  | 308     | 13<br>(-81.71) | 308     | 24<br>(-43.58) | 309     | 10<br>(-65.66) | -       | -             | 308     | 6<br>(-68.34)  | 308     | 7<br>(-49.00)  |
| K257T    | 253-LKN <b>V</b> K S KI G-261 | 258     | 36<br>(-94.04) | 257     | 4<br>(-25.09)  | 257     | 6<br>(-62.82)  | -       | -             | 260     | 18<br>(-77.40) | 260     | 22<br>(-82.14) |
| P301S    | 299-HV  <b>P</b> GGGSVQ-307   | -       | -              | -       | -              | -       | -              | -       | -             | 300     | 29<br>(-83.48) | -       | -              |



|   |               |                            |
|---|---------------|----------------------------|
| a | <b>α-Syn</b>  |                            |
|   | <b>A30P</b>   | 25-QGVAAEAAGK-33           |
|   |               | 25-QGVAE <b>P</b> AGK-33   |
|   | <b>E46K</b>   | 40-VGSKTKEGV-48            |
|   |               | 40-VGSKTK <b>K</b> GV-48   |
|   | <b>G51D</b>   | 47-GVVHGVATV-55            |
|   |               | 47-GVVH <b>D</b> VATV-55   |
|   | <b>A53T</b>   | 51-GVATVAEKT-59            |
|   |               | 51-GV <b>T</b> TVAEKT-59   |
| b | <b>Tau</b>    |                            |
|   | <b>K257T</b>  | 253-LKNVSKSIG-261          |
|   |               | 253-LKNV <b>T</b> SKIG-261 |
|   | <b>N279K</b>  | 274-KVQIINKKL-282          |
|   |               | 274-KVQII <b>K</b> KKL-282 |
|   | <b>P301S</b>  | 299-HVPGGGSVQ-307          |
|   |               | 299-HV <b>S</b> GGGSVQ-307 |
|   | <b>S305N</b>  | 304-GSVQIVYKP-312          |
|   |               | 304- <b>G</b> NVQIVYKP-312 |
| c | <b>TDP-43</b> |                            |
|   | <b>G298S</b>  | 294-GGGAGLGNN-302          |
|   |               | 294-GGGAS <b>L</b> GNN-302 |
|   | <b>A315T</b>  | 314-GAFSINPAM-322          |
|   |               | 314-G <b>T</b> FSINPAM-322 |
|   | <b>A321G</b>  | 318-INPAMMAAA-326          |
|   |               | 318-INP <b>G</b> MMAAA-326 |
|   | <b>Q331K</b>  | 327-QAALQSSWG-335          |
|   |               | 327-QAAL <b>K</b> SSWG-335 |
|   | <b>M337V</b>  | 336-MMGMLASQQ-344          |
|   |               | 336-M <b>V</b> GMLASQQ-344 |
